# Supplementary material for: Effects of aqueous and ethanolic extracts of Chinese propolis on dental pulp stem cell viability, migration and cytokine expression
Source: PeerJ. 2024 Dec 18;12:e18742. doi: 10.7717/peerj.18742 (PMC11662894; doi:10.7717/peerj.18742)
Supplement: Supplemental Information 1 [file peerj-12-18742-s001.xlsx]

## Sheet: MTT assay
	absorbance
	water extract
D3	conc mg/ml	R1	R2	R3	R4	R5	R6	R7	R8	R9	R10	R11	R12
	ctrl	0.0967	0.0874	0.071	0.0858	0.0989	0.0817	0.052	0.0526	0.06	0.0554	0.0542	0.0514
	33	0.0599	0.062	0.0567	0.064	0.0565	0.0605	0.0571	0.0774	0.0522	0.0631	0.0472	0.049
	10	0.079	0.1183	0.0863	0.0769	0.1035	0.1189	0.0607	0.0499	0.0622	0.0554	0.0517	0.0516
	3.3	0.1079	0.0962	0.1154	0.113	0.101	0.1096	0.0566	0.0579	0.059	0.0581	0.0536	0.0541
	1	0.093	0.0749	0.1272	0.0769	0.0958	0.096	0.0593	0.0547	0.0562	0.0501	0.0594	0.0547
	0.33	0.1061	0.1362	0.0674	0.0935	0.084	0.1249	0.057	0.0679	0.0525	0.0706	0.0528	0.0681
	0.1	0.1204	0.0876	0.1343	0.1378	0.1381	0.1259	0.0636	0.0626	0.0589	0.0638	0.0822	0.0484
	0.03	0.0856	0.082	0.0832	0.085	0.0882	0.091	0.0647	0.0547	0.0546	0.0529	0.0587	0.0567
D4	conc mg/ml	R1	R2	R3	R4	R5	R6
	ctrl	0.2099	0.2536	0.2468	0.2037	0.1771	0.1732
	33	0.0359	0.0469	0.0516	0.0384	0.0515	0.0371
	10	0.1026	0.133	0.1052	0.1035	0.0823	0.1201
	3.3	0.1491	0.1718	0.1192	0.1269	0.1789	0.1668
	1	0.2361	0.2312	0.1852	0.1821	0.2358	0.1762
	0.33	0.2053	0.1968	0.2426	0.2224	0.1778	0.1997
	0.1	0.2027	0.2008	0.1717	0.1694	0.1701	0.1713
	0.03	0.2357	0.208	0.1853	0.1973	0.1927	0.1937
D7	conc mg/ml	R1	R2	R3	R4	R5	R6	R7	R8	R9	R10	R11	R12	R13	R14	R15	R16	R17	R18
	ctrl	0.4398	0.4171	0.3723	0.3985	0.3447	0.2548	0.1831	0.2173	0.2022	0.2504	0.1949	0.1859
	33	0.05	0.0335	0.0355	0.0363	0.0687	0.1233	0.0553	0.0495	0.1116	0.0503	0.0448	0.0536	0.0478	0.0401	0.0406	0.0412	0.0695	0.0548
	10	0.0957	0.0819	0.0777	0.0799	0.0815	0.0837	0.095	0.0722	0.07	0.0615	0.1012	0.0619	0.0733	0.066	0.0655	0.0619	0.0789	0.1318
	3.3	0.2428	0.203	0.1945	0.203	0.1694	0.2163	0.1505	0.1138	0.1145	0.107	0.0976	0.1034	0.1469	0.0883	0.111	0.1974	0.1493	0.1647
	1	0.3538	0.3302	0.3075	0.3048	0.2765	0.2639	0.1826	0.1529	0.1255	0.1327	0.1308	0.1504	0.1947	0.2202	0.231	0.224	0.3197	0.2131
	0.33	0.3994	0.328	0.3709	0.2854	0.3183	0.296	0.1687	0.1728	0.19	0.1667	0.163	0.158	0.1924	0.2075	0.1532	0.1739	0.2282	0.2786
	0.1	0.356	0.3213	0.2861	0.2673	0.2965	0.2991	0.2019	0.1528	0.2636	0.1598	0.1968	0.1694	0.2206	0.2123	0.2538	0.2661	0.233	0.2306
	0.03	0.3315	0.329	0.3868	0.3559	0.415	0.3488	0.2217	0.2071	0.1618	0.1872	0.1963	0.241	0.2241	0.2183	0.2042	0.2106	0.3066	0.2251
	Ethanol extract
D3	conc mg/ml	R1	R2	R3	R4	R5	R6	R7	R8	R9	R10	R11	R12
	ctrl	0.0808	0.0903	0.0765	0.0744	0.07	0.0657	0.0521	0.0439	0.187x	0.0518	0.0577	0.0526
	33	0.0445	0.0466	0.0433	0.0455	0.0972	0.0496	0.0463	0.0459	0.0775	0.0503	0.0566	0.0566
	10	0.1015	0.0796	0.0985	0.0832	0.0623	0.0652	0.0451	0.0497	0.0583	0.0433	0.0478	0.0481
	3.3	0.0887	0.1006	0.0633	0.0723	0.0523	0.0593	0.0582	0.0876	0.0554	0.0473	0.0434	0.0535
	1	0.1086	0.0819	0.1078	0.0775	0.0709	0.0805	0.0769	0.0603	0.0591	0.0472	0.0643	0.0516
	0.33	0.108	0.0726	0.0704	0.0604	0.0792	0.0965	0.0518	0.0619	0.0517	0.0511	0.0415	0.0385
	0.1	0.114	0.0856	0.1397	0.0676	0.0879	0.0779	0.0442	0.048	0.0511	0.0465	0.0499	0.048
	0.03	0.1073	0.1054	0.1266	0.1133	0.1591	0.1332	0.0516	0.0634	0.0578	0.0492	0.0576	0.0489
D4	conc mg/ml	R1	R2	R3	R4	R5	R6
	ctrl	0.1791	0.1818	0.198	0.2176	0.2224	0.1889
	33	0.0372	0.0452	0.0472	0.0367	0.0653	0.0332
	10	0.1137	0.0975	0.0806	0.222	0.1297	0.1057
	3.3	0.1515	0.1814	0.2008	0.1448	0.1227	0.178
	1	0.178	0.2054	0.1336	0.2529	0.3358	0.2495
	0.33	0.2333	0.2295	0.2076	0.3058	0.2313	0.247
	0.1	0.1977	0.2322	0.214	0.172	0.1939	0.2487
	0.03	0.2263	0.2171	0.2157	0.2165	0.183	0.2079
D7	conc mg/ml	R1	R2	R3	R4	R5	R6	R7	R8	R9	R10	R11	R12	R13	R14	R15	R16	R17	R18
	ctrl	0.3306	0.3159	0.3554	0.3507	0.4706	0.4315	0.2166	0.2072	0.3258	0.1923	0.206	0.158
	33	0.0344	0.0347	0.0354	0.0346	0.0346	0.0353	0.04	0.0363	0.0547	0.0399	0.0386	0.0401	0.0495	0.0427	0.0466	0.0412	0.0417	0.0537
	10	0.1009	0.0946	0.1003	0.1013	0.1252	0.1456	0.0369	0.0576	0.0394	0.0366	0.0406	0.0353	0.0866	0.065	0.055	0.0726	0.0419	0.0332
	3.3	0.1986	0.189	0.1778	0.1909	0.2345	0.3359	0.0858	0.0623	0.0574	0.0483	0.0535	0.0536	0.0656	0.0611	0.0778	0.0584	0.0592	0.0692
	1	0.2764	0.2531	0.2646	0.2356	0.3185	0.3543	0.0655	0.0922	0.1131	0.0816	0.093	0.0952	0.1236	0.1043	0.0851	0.1073	0.0993	0.0652
	0.33	0.265	0.2692	0.2639	0.2851	0.265	0.3237	0.1478	0.1831	0.1415	0.1519	0.1696	0.1955	0.138	0.1544	0.2269	0.1738	0.2219	0.1552
	0.1	0.3176	0.2921	0.2692	0.2764	0.3181	0.3774	0.2756	0.2355	0.2198	0.3252	0.2506	0.1916	0.2101	0.2191	0.1647	0.2191	0.2178	0.1589
	0.03	0.3546	0.3789	0.3826	0.3921	0.3605	0.4009	0.2248	0.1732	0.1534	0.2043	0.1942	0.2196	0.1841	0.2842	0.2477	0.1975	0.1944	0.1926

## Sheet: dapi staining2
	number of nuclei
	water extract
D7	conc mg/ml	R1	R2	R3	R4	R5	R6	R7	R8	R9	R10	R11	R12	R13	R14	R15
	ctrl	145	175	153	185	162	57	103	82	104	112	135	108	97	133
	0.03	179	128	165	153	105	56	175	79	96	79
	0.1	124	156	96	108	127	69	126	97	121	129
	0.33	133	167	144	97	186	103	120	45	99	101
	1	152	166	139	75	141	109	192	112	98	100
	3.3	48	127	55	57	28	103	120	45	99	101
	10	36	76	25	42	34	68	137	48	84	65
	33	16	19	24	22	30	7	35	37	30	17	16	29	39	24	34
	Ethanol extract
D7	conc mg/ml	R1	R2	R3	R4	R5	R6	R7	R8	R9	R10	R11	R12	R13	R14	R15
	ctrl	141	127	46	135	118	71	125	86	107	97	113	163	104	70	122
	0.03	69	185	151	74	61	108	151	88	125	90
	0.1	79	192	90	106	75	44	150	112	97	132
	0.33	53	43	50	22	47	70	105	56	70	72
	1	44	50	18	53	32	21	143	67	31	33
	3.3	13	65	17	26	13	22	25	35	34	18
	10	7	3	4	3	3	2	5	2	2	5	2	5	6	4	5
	33	4	5	5	7	3	4	3	2	3	5

## Sheet: migration
		number of migrating cell
		Ctrl	TAP	AEP 0.03	AEP 0.1	AEP 3.3	EEP 0.03	EEP 0.1	EEP 3.3
expe1	replicate 1	2	1	8	18	4	9	16	2
expe1	replicate 2	0	2	11	23	12	11	29	15
expe1	replicate 3	1	0	9	36	5	6	20	11
expe1	replicate 4	1	1	9	33	9	7	29	4
expe1	replicate 5	0	0					27	11
expe2	replicate 1	2	3	1	9	6	0	6	5
expe2	replicate 2	2	4	5	7	23	0	10	7
expe2	replicate 3	1	1	1	12	11	3	7	2
expe2	replicate 4	0	0	3	8	8	2	4	5
expe2	replicate 5	4	4	15	14	7	5	6	2
expe3	replicate 1	2		12	24	24	33	53	10
expe3	replicate 2	3		2	59	12	30	35	23
expe3	replicate 3	5		27	25	9	11	16	13
expe3	replicate 4	0		13	47	2	8	6	12
expe3	replicate 5	0		33	41	21	15	13	3
expe4	replicate 1	7		41		16	35		9
expe4	replicate 2			27		7	12		4
expe4	replicate 3	3		40		23	7		21
expe4	replicate 4	7		4		13	7		5
expe4	replicate 5	5		18		15	22		2

## Sheet: alizarin qtf
		absorbance at 405 nm
		Ctrl	ODM	AEP 0.1	EEP 0.1
expe1	replicate 1	0.161	0.377	0.153	0.138
expe1	replicate 2	0.162	0.346	0.167	0.154
expe2	replicate 1	0.173	0.341	0.144	0.141
expe2	replicate 2	0.1698	0.6445	0.1613	0.1666
expe3	replicate 1	0.1721	0.3614	0.1888	0.173
expe3	replicate 2	0.1641	0.6442	0.2008	0.1869

## Sheet: PCR differentiation
DMP1	Experimental group 1			WEP 0.1mg/ml						DSPP	Experimental group 1			WEP 0.1mg/ml						MEPE	Experimental group 1			WEP 0.1mg/ml
	sample #	Ct HKG	Ct target gene	A=Ct HKG-Ct target		A-B	2^(A-B)	average 2^(A-B)			sample #	Ct HKG	Ct target gene	A=Ct HKG-Ct target		A-B	2^(A-B)	average 2^(A-B)			sample #	Ct HKG	Ct target gene	A=Ct HKG-Ct target		A-B	2^(A-B)	average 2^(A-B)
	5 W1	19.22	37.41	-18.19		1.644	3.12531				5 W1	19.22	36.7	-17.48		1.566	2.96083				5 W1	19.22	36.5	-17.28		0.9692	1.95775
	6 W1	19.25	38.35	-19.1		0.734	1.66324				6 W1	19.25	37.28	-18.03		1.016	2.0223				6 W1	19.25	36.7	-17.45		0.7992	1.74014
	7 W1	19.28	37.1	-17.82		2.014	4.03901				7 W1	19.28	40	-20.72		-1.674	0.313383				7 W1	19.28	36.13	-16.85		1.3992	2.63755
	11w	19.05	40	-20.95		-1.116	0.461371				11w	19.05	36.91	-17.86		1.186	2.27521				11w	19.05	39.25	-20.2		-1.9508	0.258673
	13w	20.7	39.5	-18.8		1.034	2.04769				13w	20.7	39.84	-19.14		-0.094	0.936921				13w	20.7	38.66	-17.96		0.2892	1.22196
								2.26733										1.70173										1.56322
	Experimental group 2			EEP 0.1mg/ml							Experimental group 2			EEP 0.1mg/ml							Experimental group 2			EEP 0.1mg/ml
	sample #	Ct HKG	Ct target gene	A=Ct HKG-Ct target		A-B	2^(A-B)	average 2^(A-B)			sample #	Ct HKG	Ct target gene	A=Ct HKG-Ct target		A-B	2^(A-B)	average 2^(A-B)			sample #	Ct HKG	Ct target gene	A=Ct HKG-Ct target		A-B	2^(A-B)	average 2^(A-B)
	5 E1	19.11	37.49	-18.38		1.454	2.73967				5 E1	19.11	36.36	-17.25		1.796	3.47256				5 E1	19.11	35.5	-16.39		1.8592	3.62806
	6 E1	19.11	40	-20.89		-1.056	0.480964				6 E1	19.11	38.6	-19.49		-0.444	0.735094				6 E1	19.11	36.97	-17.86		0.3892	1.30967
	7 E1	19.17	37.06	-17.89		1.944	3.84771				7 E1	19.17	37.52	-18.35		0.696	1.62001				7 E1	19.17	36.93	-17.76		0.4892	1.40367
	11e	19.74	40	-20.26		-0.426	0.744323				11e	19.74	40	-20.26		-1.214	0.431072				11e	19.74	37.93	-18.19		0.0592	1.04189
	12e	20.05	39.65	-19.6		0.234	1.17609				12e	20.05	37.69	-17.64		1.406	2.65001				12e	20.05	38.66	-18.61		-0.3608	0.778733
	13e	20.47	40	-19.53		0.304	1.23456				13e	20.47	38.24	-17.77		1.276	2.42167				13e	20.47	38.48	-18.01		0.2392	1.18034
								1.70389										1.8884										1.55706
	Experimental group 3			ODM							Experimental group 3			ODM							Experimental group 3			ODM
	sample #	Ct HKG	Ct target gene	A=Ct HKG-Ct target		A-B	2^(A-B)	average 2^(A-B)			sample #	Ct HKG	Ct target gene	A=Ct HKG-Ct target		A-B	2^(A-B)	average 2^(A-B)			sample #	Ct HKG	Ct target gene	A=Ct HKG-Ct target		A-B	2^(A-B)	average 2^(A-B)
	5DM	19.018	37.14	-18.122		1.712	3.27615				5DM	19.018	35.81	-16.792		2.254	4.77004				5DM	19.018	34.82	-15.802		2.4472	5.45357
	6DM	19.1	37.48	-18.38		1.454	2.73967				6DM	19.1	37.8	-18.7		0.346	1.27103				6DM	19.1	34.78	-15.68		2.5692	5.9348
	7DM	19.4	36.64	-17.24		2.594	6.0377				7DM	19.4	38.16	-18.76		0.286	1.21926				7DM	19.4	36.68	-17.28		0.9692	1.95775
	11dm	20.51	38.56	-18.05		1.784	3.4438				11dm	20.51	39.65	-19.14		-0.094	0.936921				11dm	20.51	37.61	-17.1		1.1492	2.21791
	12dm	20.76	40	-19.24		0.594	1.50943				12dm	20.76	39.03	-18.27		0.776	1.71238				12dm	20.76	38.39	-17.63		0.6192	1.53602
	13dm	23.32	40	-16.68		3.154	8.9012				13dm	23.32	39.96	-16.64		2.406	5.30003				13dm	23.32	38.8	-15.48		2.7692	6.8173
								4.31799										2.53494										3.98623
	control group										control group										control group
	sample #	Ct HKG	Ct target gene	A=Ct HKG-Ct target	B=average of A ctrl DPSC	A-B	2^(A-B)	average 2^(A-B)			sample #	Ct HKG	Ct target gene	A=Ct HKG-Ct target	B=average of A ctrl DPSC	A-B	2^(A-B)	average 2^(A-B)			sample #	Ct HKG	Ct target gene	A=Ct HKG-Ct target	B=average of A ctrl DPSC	A-B	2^(A-B)	average 2^(A-B)
	5C	18.21	38.85	-20.64		-0.806	0.571965				5C	18.21	38.5	-20.29		-1.244	0.4222				6C	18.84	36.13	-17.29		0.9592	1.94423
	6C	18.84	38.63	-19.79		0.044	1.03097				6C	18.84	37.9	-19.06		-0.014	0.990343				7C	18.9	38.16	-19.26		-1.0108	0.496271
	7C	18.9	40	-21.1		-1.266	0.415811				7C	18.9	37.63	-18.73		0.316	1.24487				11c	21.78	39.71	-17.93		0.3192	1.24764
	12c	21.14	39.86	-18.72		1.114	2.16445				12c	21.14	39.57	-18.43		0.616	1.53262				12c	21.14	40	-18.86		-0.6108	0.654833
	13c	21	39.92	-18.92		0.914	1.88426				13c	21	39.72	-18.72		0.326	1.25353				13c	21	38.906	-17.906		0.3432	1.26857
					-19.834										-19.046										-18.2492
								1.21349										1.08871										1.12231

## Sheet: PCR cytokines
CCL2	Experimental group 1			LPS + WEP 0.1mg/ml						IL1	Experimental group 1			LPS + WEP 0.1mg/ml						IL6	Experimental group 1			LPS + WEP 0.1mg/ml						IL8	Experimental group 1			LPS + WEP 0.1mg/ml
	sample #	Ct HKG	Ct target gene	A=Ct HKG-Ct target		A-B	2^(A-B)	average 2^(A-B)			sample #	Ct HKG	Ct target gene	A=Ct HKG-Ct target		A-B	2^(A-B)	average 2^(A-B)			sample #	Ct HKG	Ct target gene	A=Ct HKG-Ct target		A-B	2^(A-B)	average 2^(A-B)			sample #	Ct HKG	Ct target gene	A=Ct HKG-Ct target		A-B	2^(A-B)	average 2^(A-B)
	W1	21.395	28.6793	-7.28436		0.810402	1.7537				W1	21.395	32.2629	-10.8679		0.194089	1.144				W1	21.395	29.2758	-7.88086		-0.145316	0.904181				W1	21.395	25.9847	-4.58975		4.48689	22.4228
	W2	20.3105	28.6238	-8.31337		-0.218613	0.859391				W2	20.3105	31.7334	-11.4229		-0.360936	0.778659				W2	20.3105	26.5229	-6.21245		1.52309	2.87407				W2	20.3105	25.544	-5.23355		3.84309	14.3511
	W3	22.5095	28.5157	-6.00617		2.08859	4.25331				W3	22.5095	31.6638	-9.15424		1.90774	3.7522				W3	22.5095	26.4363	-3.92676		3.80878	14.0138				W3	22.5095	26.3258	-3.81625		5.26039	38.3296
	W4	25.9796	30.831	-4.85133		3.24343	9.47043				W4	25.9796	35.2093	-9.22961		1.83236	3.5612				W4	25.9796	28.8125	-2.8329		4.90264	29.9117				W4	25.9796	28.8544	-2.8747		6.20194	73.6154
	W5	20.887	27.2975	-6.41056		1.6842	3.21362				W5	20.887	31.4763	-10.5893		0.47266	1.38767				W5	20.887	25.3282	-4.44118		3.29436	9.81075				W5	20.887	25.6777	-4.79074		4.28591	19.5068
	W6	21.7277	24.5047	-2.77695		5.31782	39.8862				W6	21.7277	32.0969	-10.3692		0.692784	1.6164				W6	21.7277	26.3412	-4.61342		3.12212	8.70666				W6	21.7277	24.8009	-3.07313		6.00351	64.1559
	W7	20.8099	24.2764	-3.46643		4.62833	24.7323				W7	20.8099	31.3379	-10.528		0.534003	1.44794				W7	20.8099	26.2687	-5.45874		2.2768	4.846				W7	20.8099	25.0963	-4.28635		4.79029	27.6708
	W8	20.8577	23.9251	-3.06738		5.02738	32.6132				W8	20.8577	32.3271	-11.4694		-0.407469	0.753945				W8	20.8577	26.6302	-5.77253		1.96301	3.89873				W8	20.8577	24.8951	-4.03741		5.03923	32.8821
								14.5978										1.80525										9.37074										36.6168
	Experimental group 2			LPS + EEP 0.1mg/ml							Experimental group 2			LPS + EEP 0.1mg/ml							Experimental group 2			LPS + EEP 0.1mg/ml							Experimental group 2			LPS + EEP 0.1mg/ml
	sample #	Ct HKG	Ct target gene	A=Ct HKG-Ct target		A-B	2^(A-B)	average 2^(A-B)			sample #	Ct HKG	Ct target gene	A=Ct HKG-Ct target		A-B	2^(A-B)	average 2^(A-B)			sample #	Ct HKG	Ct target gene	A=Ct HKG-Ct target		A-B	2^(A-B)	average 2^(A-B)			sample #	Ct HKG	Ct target gene	A=Ct HKG-Ct target		A-B	2^(A-B)	average 2^(A-B)
	E1	21.1927	27.213	-6.02038		2.07438	4.21164				E1	21.1927	31.043	-9.85034		1.21164	2.316				E1	21.1927	26.0185	-4.82588		2.90966	7.51443				E1	21.1927	25.4085	-4.21583		4.86081	29.0569
	E2	23.9139	30.3491	-6.43516		1.6596	3.15929				E2	23.9139	33.7352	-9.82126		1.24071	2.36315				E2	23.9139	28.7605	-4.84656		2.88898	7.40745				E2	23.9139	28.6611	-4.74713		4.32951	20.1054
	E3	22.1049	27.3215	-5.21657		2.87819	7.35228				E3	22.1049	31.1738	-9.06892		1.99305	3.98079				E3	22.1049	26.0796	-3.97467		3.76087	13.5561				E3	22.1049	26.0207	-3.91574		5.1609	35.7754
	E4	19.8869	26.6518	-6.76495		1.32981	2.5137				E4	19.8869	30.8431	-10.9562		0.105796	1.07609				E4	19.8869	25.1107	-5.22381		2.51173	5.70303				E4	19.8869	24.8557	-4.96881		4.10783	17.2417
	E5	20.2259	26.8592	-6.6333		1.46146	2.75388				E5	20.2259	30.7705	-10.5446		0.517347	1.43132				E5	20.2259	25.4396	-5.21372		2.52182	5.74305				E5	20.2259	25.3174	-5.09149		3.98515	15.8361
	E6	21.7549	27.6072	-5.85234		2.24243	4.73192				E6	21.7549	30.1051	-8.35021		2.71176	6.55123				E6	21.7549	26.3481	-4.5932		3.14234	8.82955				E6	21.7549	26.3417	-4.58675		4.48989	22.4694
	E7	20.3885	24.0213	-3.63275		4.46201	22.0394				E7	20.3885	31.6831	-11.2946		-0.232605	0.851097				E7	20.3885	26.6202	-6.23164		1.5039	2.83609				E7	20.3885	24.1504	-3.76189		5.31475	39.8015
	E8	20.8227	23.8433	-3.02058		5.07418	33.6884				E8	20.8227	32.079	-11.2563		-0.194308	0.873992				E8	20.8227	26.5501	-5.72742		2.00812	4.02257				E8	20.8227	24.998	-4.17531		4.90133	29.8847
	E9	21.2249	24.2275	-3.0026		5.09216	34.1108				E9	21.2249	32.0851	-10.8602		0.201751	1.15009				E9	21.2249	27.144	-5.91913		1.8164	3.52202				E9	21.2249	24.8108	-3.58591		5.49073	44.9649
								12.729										2.2882										6.57047										28.3484
	Experimental group 3			LPS 0.1 ug/ml							Experimental group 3			LPS 0.1 ug/ml							Experimental group 3			LPS 0.1 ug/ml							Experimental group 3			LPS 0.1 ug/ml
	sample #	Ct HKG	Ct target gene	A=Ct HKG-Ct target		A-B	2^(A-B)	average 2^(A-B)			sample #	Ct HKG	Ct target gene	A=Ct HKG-Ct target		A-B	2^(A-B)	average 2^(A-B)			sample #	Ct HKG	Ct target gene	A=Ct HKG-Ct target		A-B	2^(A-B)	average 2^(A-B)			sample #	Ct HKG	Ct target gene	A=Ct HKG-Ct target		A-B	2^(A-B)	average 2^(A-B)
	L1	26.387	31.2336	-4.84667		3.24809	9.5011				L1	26.387	35.1931	-8.8061		2.25588	4.77625				L1	26.387	29.6257	-3.23873		4.49681	22.5774				L1	26.387	29.1641	-2.77716		6.29948	78.765
	L2	28.5942	31.9047	-3.31042		4.78434	27.5569				L2	28.5942	35.3909	-6.79667		4.26531	19.2303				L2	28.5942	30.6886	-2.09434		5.6412	49.9082				L2	28.5942	30.4937	-1.89946		7.17718	144.726
	L3	24.357	30.7233	-6.36626		1.7285	3.31384				L3	24.357	34.0566	-9.69954		1.36244	2.5712				L3	24.357	29.1334	-4.77639		2.95915	7.77665				L3	24.357	28.1704	-3.81334		5.2633	38.4071
	L4	27.494	29.4058	-1.91178		6.18298	72.6543				L4	27.494	33.4428	-5.94875		5.11323	34.6127				L4	20.5744	25.4831	-4.90864		2.8269	7.09546				L4	20.5744	24.834	-4.25956		4.81708	28.1895
	L5	22.9773	24.436	-1.45873		6.63603	99.4588				L5	22.9773	31.8189	-8.8416		2.22038	4.66015				L5	27.494	30.8475	-3.35353		4.38201	20.8504				L5	22.0739	25.6563	-3.58239		5.49425	45.0747
	L6	24.2243	28.0989	-3.87463		4.22013	18.6374				L6	24.2243	33.9551	-9.7308		1.33118	2.51608				L6	22.9773	26.1733	-3.19601		4.53953	23.256				L6	22.9773	25.2794	-2.30211		6.77453	109.48
	L7	26.3753	28.6943	-2.319		5.77576	54.7869				L7	26.3753	36.1111	-9.73575		1.32622	2.50745				L7	28.097	32.4819	-4.38487		3.35067	10.2012				L7	26.3753	31.02	-4.64467		4.43197	21.5851
	L8	22.1315	26.9854	-4.85391		3.24085	9.4535				L8	22.1315	30.06	-7.9285		3.13348	8.77548				L8	28.2663	32.6423	-4.37597		3.35957	10.2643				L8	22.1315	26.111	-3.97953		5.09711	34.2281
								36.9203										9.9562										18.9912										62.557
	control group										control group										control group										control group
	sample #	Ct HKG	Ct target gene	A=Ct HKG-Ct target	B=average of A ctrl DPSC	A-B	2^(A-B)	average 2^(A-B)			sample #	Ct HKG	Ct target gene	A=Ct HKG-Ct target	B=average of A ctrl DPSC	A-B	2^(A-B)	average 2^(A-B)			sample #	Ct HKG	Ct target gene	A=Ct HKG-Ct target	B=average of A ctrl DPSC	A-B	2^(A-B)	average 2^(A-B)			sample #	Ct HKG	Ct target gene	A=Ct HKG-Ct target	B=average of A ctrl DPSC	A-B	2^(A-B)	average 2^(A-B)
	T1	23.3985	31.2711	-7.87257		0.222188	1.1665				T1	23.3985	35.38	-11.9815		-0.919475	0.528701				T1	23.3985	31.4565	-8.05802		-0.322477	0.799696				T1	23.3985	32.0877	-8.6892		0.387445	1.30807
	T2	24.7514	31.0406	-6.28917		1.80559	3.49572				T2	24.7514	34.8318	-10.0804		0.981551	1.97459				T2	24.7514	31.442	-6.69064		1.0449	2.06323				T2	24.7514	32.6414	-7.89005		1.18659	2.27615
	T3	23.0227	29.9241	-6.90136		1.1934	2.28691				T3	23.0227	33.9217	-10.899		0.162946	1.11957				T3	23.0227	29.2903	-6.26759		1.46795	2.76628				T3	23.0227	30.5933	-7.57055		1.50609	2.84039
	T4	23.9541	31.9531	-7.999		0.095759	1.06863				T4	23.9541	33.8746	-9.92053		1.14144	2.20601				T4	23.9541	29.1082	-5.15412		2.58142	5.98527				T4	23.9541	30.7405	-6.78637		2.29027	4.89148
	T5	23.7244	32.8893	-9.16485		-1.07009	0.47629				T5	23.7244	35.4989	-11.7745		-0.712521	0.610253				T5	23.7244	30.9511	-7.22669		0.508845	1.42291				T5	23.7244	31.0203	-7.29585		1.78079	3.43614
	T6	26.9205	38.0873	-11.1668		-3.07203	0.118912				T6	26.9205	36.4989	-9.5784		1.48357	2.7964				T6	26.9205	33.8205	-6.89996		0.835578	1.78457				T6	26.9205	34.5463	-7.62575		1.45089	2.73377
	T7	20.8504	28.0162	-7.16579		0.92897	1.90392				T7	20.8504	32.8393	-11.9888		-0.926855	0.526004				T7	20.8504	33.1953	-12.3448		-4.60927	0.0409704				T7	20.8504	34.5463	-13.6958		-4.61921	0.0406893
	T8	21.2205	29.419	-8.19855		-0.10379	0.930585				T8	21.2205	33.4931	-12.2726		-1.21066	0.432071				T8	21.2205	30.463	-9.24248		-1.50694	0.351857				T8	21.2205	34.28	-13.0595		-3.98287	0.0632465
					-8.09476										-11.062										-7.73554										-9.07664
								1.43093										1.2742										1.90185										2.19874

## Sheet: MTT assay Vehcles
	absorbance
	water extract solvant
D7	conc mg/ml	R1	R2	R3	R4	R5	R6	R7	R8	R9	R10	R11	R12
	ctrl	0.22315	0.2404	0.23445	0.23615	0.2686	0.2474	0.25435	0.2765	0.2223	0.22115	0.26605	0.29465
	solvant 1/3000	0.2123	0.23425	0.23475	0.2431	0.26435	0.25755	0.25785	0.2788	0.257	0.2714	0.2709	0.23215
	solvant 1/1000	0.2142	0.22075	0.2125	0.23985	0.2302	0.26845	0.27315	0.2888	0.27035	0.24975	0.251	0.2572
	solvant 1/300	0.3019	0.21615	0.24745	0.2745	0.2912	0.27	0.29755	0.2862	0.295	0.2562	0.2539	0.23875
	solvant 1/100	0.20695	0.2762	0.23695	0.2324	0.2598	0.2797	0.2696	0.287	0.2857	0.2379	0.3202	0.2761
	solvant 1/30	0.2083	0.25705	0.24135	0.23935	0.25135	0.22215	0.26125	0.2499	0.27165	0.2452	0.24825	0.2298
	solvant 1/10	0.2723	0.25915	0.25915	0.26425	0.2611	0.26835	0.27095	0.2482	0.21875	0.2147	0.2286	0.21325
	solvant 1/3	0.191	0.18335	0.17115	0.2686	0.18225	0.1873	0.18775	0.20115	0.23215	0.22005	0.2143	0.22135
	Ethanol extract solvant
D7	conc mg/ml	R1	R2	R3	R4	R5	R6	R7	R8	R9	R10	R11	R12
	ctrl	0.27715	0.2224	0.23805	0.2281	0.2398	0.23835	0.2077	0.31045	0.27425	0.2415	0.23645	0.2287
	solvant 1/3000	0.3072	0.297	0.24245	0.2991	0.2548	0.212	0.22985	0.2239	0.21335	0.221	0.2159	0.29545
	solvant 1/1000	0.19865	0.20625	0.20965	0.2448	0.20985	0.2444	0.2654	0.237	0.2909	0.24585	0.2988	0.2223
	solvant 1/300	0.1986	0.2341	0.2283	0.24135	0.27965	0.27045	0.25165	0.2302	0.3113	0.2222	0.2515	0.3408
	solvant 1/100	0.1967	0.2157	0.28555	0.2102	0.2259	0.2845	0.22025	0.2376	0.2455	0.27595	0.265	0.2676
	solvant 1/30	0.2083	0.2509	0.2762	0.2722	0.2474	0.3269	0.2351	0.2512	0.2587	0.232	0.22235	0.2084
	solvant 1/10	0.2035	0.20805	0.2159	0.22025	0.216	0.25585	0.2546	0.21405	0.27565	0.22995	0.28495	0.19375
	solvant 1/3	0.1897	0.1921	0.17675	0.2198	0.17375	0.18225	0.1957	0.21825	0.24945	0.186	0.2028	0.21975

## Sheet: ampli efficiency primers
		CT value
	log2(total cDNA concentration)	DSPP			DMP1			MEPE			IL1			IL6			IL8			CCL2			GAPDH
		R1	R2	R3	R1	R2	R3	R1	R2	R3	R1	R2	R3	R1	R2	R3	R1	R2	R3	R1	R2	R3	R1	R2	R3
	4.64386	33.4009	33.7326	33.7772	33.1441	33.1686	33.1394	31.3088	31.3104	31.4002	30.9388	31.0876	31.2055	25.2397	25.4498	25.3013	24.466	24.382	24.5205	20.7787	20.7994	20.7512	16.1361	16.3106	16.094
	3.58496	34.7788	34.8061	34.7912	34.3779	34.3568	34.2108	32.509	32.5296	32.7638	32.3189	32.1731	32.1356	26.3048	26.3447	26.328	25.4745	25.6524	25.595	21.8978	21.9031	22.0367	17.1689	17.2081	17.0941
	2.58496	35.3111	35.6469	35.4909	35.1241	35.3718	35.2422	33.6656	33.508	33.6129	33.0779	33.0708	33.2886	27.3787	27.3532	27.3922	26.3089	26.7699	26.7528	22.9617	22.8899	22.9345	18.1596	17.9686	18.0962
	1.58496	36.4088	36.3779	36.3391	36.3337	36.1099	36.0143	34.4746	34.3779	34.4782	34.4631	34.6921	34.3776	28.3626	28.3648	28.4354	27.7985	27.6996	27.708	23.881	23.9358	23.9593	19.1939	18.8057	19.1398
	0.584963	37.0455	37.2154	37.2041	37.0191	36.9646	37.2743	35.5865	35.3992	35.3391	34.8752	35.063	34.9938	29.5089	29.3658	29.6556	28.91	28.8538	29.0974	25.1151	24.893	24.8551	20.2467	19.9888	20.1907
	-0.51457	38.7891	38.3337	38.0191	38.6656	38.508	38.8128	36.4337	36.0099	36.1143	35.9483	36.2835	36.0438	30.352	30.3575	30.6529	29.9592	29.75	29.9219	25.9308	26.1494	25.8286	21.1359	21.0696	21.1434
