# Supplementary material for: Effects of aqueous and ethanolic extracts of Chinese propolis on dental pulp stem cell viability, migration and cytokine expression
Source: PeerJ. 2024 Dec 18;12:e18742. doi: 10.7717/peerj.18742 (PMC11662894; doi:10.7717/peerj.18742)
Supplement: Supplemental Information 3 [file peerj-12-18742-s003.xls]

## Sheet: Sheet1
ITEM TO CHECK	IMPORTANCE	CHECKLIST
EXPERIMENTAL DESIGN
Definition of experimental and control groups	E	Page 4, Line 144-157; Page 5 line 207-209; Page 5 line 217-220
Number within each group	E	P-15, L-650; P-15 L-656
Assay carried out by core lab or investigator's lab?	D	P-14 L-577
Acknowledgement of authors' contributions	D	P-14 L-572-580
SAMPLE
Description	E	P-5 L-217
Volume/mass of sample processed	D	P-6 L-221
Microdissection or macrodissection	E	n/a
Processing procedure	E	n/a
If frozen - how and how quickly?	E	n/a
If fixed - with what, how quickly?	E	n/a
Sample storage conditions and duration (especially for FFPE samples)	E	n/a
NUCLEIC ACID EXTRACTION
Procedure and/or instrumentation	E	Page 5 line 217-234
Name of kit and details of any modifications	E	Page 5 line 217-234
Source of additional reagents used	D	Page 5 line 217-234
Details of DNase or RNAse treatment	E	Page 5 line 217-234
Contamination assessment (DNA or RNA)	E	Page 5 line 217-234
Nucleic acid quantification	E	Page 5 line 217-234
Instrument and method	E	Page 5 line 217-234
Purity (A260/A280)	D	Page 5 line 217-234
Yield	D	Page 5 line 217-234
RNA integrity method/instrument	E	Page 5 line 217-234
RIN/RQI or Cq of 3' and 5' transcripts	E	n/a
Electrophoresis traces	D	n/a
Inhibition testing (Cq dilutions, spike or other)	E	n/a
REVERSE TRANSCRIPTION
Complete reaction conditions	E	Page 5 line 217-234
Amount of RNA and reaction volume	E	Page 5 line 217-234
Priming oligonucleotide (if using GSP) and concentration	E	n/a
Reverse transcriptase and concentration	E	Page 5 line 217-234
Temperature and time	E	Page 5 line 217-234
Manufacturer of reagents and catalogue numbers	D
Cqs with and without RT	D*	Page 5 line 217-234
Storage conditions of cDNA	D
qPCR TARGET INFORMATION
If multiplex, efficiency and LOD of each assay.	E	n/a
Sequence accession number	E	n/a
Location of amplicon	D	n/a
Amplicon length	E	n/a
In silico specificity screen (BLAST, etc)	E	n/a
Pseudogenes, retropseudogenes or other homologs?	D	n/a
Sequence alignment	D	n/a
Secondary structure analysis of amplicon	D	n/a
Location of each primer by exon or intron (if applicable)	E	n/a
What splice variants are targeted?	E	n/a
qPCR OLIGONUCLEOTIDES
Primer sequences	E	Page 5 line 217-234
RTPrimerDB Identification Number	D	Page 5 line 217-234
Probe sequences	D**
Location and identity of any modifications	E	n/a
Manufacturer of oligonucleotides	D	Page 5 line 217-234
Purification method	D
qPCR PROTOCOL
Complete reaction conditions	E
Reaction volume and amount of cDNA/DNA	E	Page 5 line 217-234
Primer, (probe), Mg++ and dNTP concentrations	E	Page 5 line 217-234
Polymerase identity and concentration	E	Page 5 line 217-234
Buffer/kit identity and manufacturer	E	Page 5 line 217-234
Exact chemical constitution of the buffer	D	n/a
Additives (SYBR Green I, DMSO, etc.)	E	Page 5 line 217-234
Manufacturer of plates/tubes and catalog number	D
Complete thermocycling parameters	E	Page 5 line 217-234
Reaction setup (manual/robotic)	D
Manufacturer of qPCR instrument	E	Page 5 line 217-234
qPCR VALIDATION
Evidence of optimisation (from gradients)	D	n/a
Specificity (gel, sequence, melt, or digest)	E	n/a
For SYBR Green I, Cq of the NTC	E	n/a
Standard curves with slope and y-intercept	E	n/a
PCR efficiency calculated from slope	E	n/a
Confidence interval for PCR efficiency or standard error	D	n/a
r2 of standard curve	E	n/a
Linear dynamic range	E	n/a
Cq variation at lower limit	E	n/a
Confidence intervals throughout range	D	n/a
Evidence for limit of detection	E	n/a
If multiplex, efficiency and LOD of each assay.	E	n/a
DATA ANALYSIS
qPCR analysis program (source, version)	E	Page 5 line 217-234
Cq method determination	E	n/a
Outlier identification and disposition	E	n/a
Results of NTCs	E	Page 5 line 217-234
Justification of number and choice of reference genes	E	Page 5 line 217-234
Description of normalisation method	E	Page 5 line 217-234
Number and concordance of biological replicates	D	Page 5 line 217-234 P-15, L-650; P-15 L-656
Number and stage (RT or qPCR) of technical replicates	E	Page 5 line 217-234
Repeatability (intra-assay variation)	E	Page 5 line 217-234
Reproducibility (inter-assay variation, %CV)	D
Power analysis	D
Statistical methods for result significance	E	Page 6 line 239-244
Software (source, version)	E	Page 5 line 217-234
Cq or raw data submission using RDML	D
Table 1. MIQE checklist for authors, reviewers and editors. All essential information (E) must be submitted with the manuscript. Desirable
information (D) should be submitted if available. If using primers obtained from RTPrimerDB, information on qPCR target, oligonucleotides,
protocols and validation is available from that source.
*: Assessing the absence of DNA using a no RT assay is essential when first extracting RNA. Once the sample has been validated as
RDNA-free, inclusion of a no-RT control is desirable, but no longer essential.
**: Disclosure of the probe sequence is highly desirable and strongly encouraged. However, since not all commercial pre-designed assay
vendors provide this information, it cannot be an essential requirement. Use of such assays is advised against.
